# Supplementary material for: Roles of Distal and Genic Methylation in the Development of Prostate Tumorigenesis Revealed by Genome-wide DNA Methylation Analysis
Source: PubMed Central journal article supplement (PMC4770430; doi:10.1038/srep22051), 2016-02-29
Supplement: srep22051-s1.pdf [file srep22051-s1.pdf]

## Supplementary Information

### **Roles of Distal and Genic Methylation in the Development of Prostate Tumorigenesis Revealed by Genome-wide DNA Methylation Analysis**

Yao Vickie Wang<sup>1</sup>, Rohit Ramakant Jadhav<sup>1</sup>, Joseph Liu<sup>1</sup>, Yidong Chen<sup>2</sup>, Ian M. Thompson<sup>3,4</sup>, Dean A. Troyer<sup>5</sup>, Javier Hernandez<sup>3</sup>, Huidong Shi<sup>6</sup>, Robin J. Leach<sup>3,4,7</sup>, Tim H-M Huang<sup>1,4</sup>, and Victor X Jin<sup>1,2</sup>

<sup>1</sup>Department of Molecular Medicine, <sup>2</sup>Department of Epidemiology and Biostatistics, <sup>3</sup>Department of Urology, <sup>4</sup>Cancer Therapy and Research Center, <sup>5</sup>Department of Pathology, <sup>7</sup>Department of Cellular and Structural Biology, The University of Texas Health Science Center at San Antonio, San Antonio, TX 78229; <sup>6</sup>Department of Biochemistry and Molecular Biology, Georgia Regents University, Augusta, GA 30912

Corresponding author:

Dr. Victor X Jin, Department of Molecular Medicine, University of Texas Health Science Center, 8403 Floyd Curl, San Antonio, TX 78229. Tel: 210-5629209; Email: [jinv@uthscsa.edu](mailto:jinv@uthscsa.edu)

## Table of Contents

|                                                                                                                                                                                |    |
|--------------------------------------------------------------------------------------------------------------------------------------------------------------------------------|----|
| Supplemental Table S1. Patient information of prostate cancer cohort.....                                                                                                      | 3  |
| Supplemental Table S2. MBD-Seq data information .....                                                                                                                          | 5  |
| Supplemental Table S3. Number of genes used in IPA analysis .....                                                                                                              | 7  |
| Supplemental Table S4. Genes shown in the network in Figure 4 that are also up regulated in TCGA data .....                                                                    | 7  |
| Supplemental Table S5. Genes shown in the network in Figure 4 that are also down regulated in TCGA data .....                                                                  | 8  |
| Supplemental Table S6. Genes that are only in very high risk group and also differentially methylated in cohort as well as differentially expressed in TCGA RNA-seq data ..... | 9  |
| Supplemental Figure S1. Venn diagram of differential expressed genes between different risk group in each CMP .....                                                            | 10 |
| Supplemental Figure S2. S0D0 Canonical Pathways .....                                                                                                                          | 10 |
| Supplemental Figure S3. S0D1 Canonical Pathways .....                                                                                                                          | 11 |
| Supplemental Figure S4. S0E0 Canonical Pathways.....                                                                                                                           | 11 |
| Supplemental Figure S5. S1D0 Canonical Pathways .....                                                                                                                          | 11 |
| Supplemental Figure S6. S1D1 Canonical Pathways .....                                                                                                                          | 12 |
| Supplemental Figure S7. S1G1 Canonical Pathways .....                                                                                                                          | 13 |
| Supplemental Figure S8. S1E1 Canonical Pathways.....                                                                                                                           | 14 |
| Supplemental Figure S9. Kaplan Meier curve of genes that are only differentially expressed and methylated in very high risk group .....                                        | 15 |

**Supplemental Table S1. Patient information of prostate cancer cohort**

|    | Patient ID | Group    | Age | Gleason Score | PSA   | T Stage | N stage | M stage |
|----|------------|----------|-----|---------------|-------|---------|---------|---------|
| 1  | HG_LCH_01  | Normal   | 73  | —             | —     | —       | —       | —       |
| 2  | HG_LCH_04  | Normal   | 66  | —             | —     | —       | —       | —       |
| 3  | HG_LCH_05  | Normal   | 58  | —             | —     | —       | —       | —       |
| 4  | HG_LCH_06  | Normal   | 80  | —             | —     | —       | —       | —       |
| 5  | HG_LCH_09  | Normal   | 77  | —             | —     | —       | —       | —       |
| 6  | HG_LCG_10  | Normal   | 66  | —             | —     | —       | —       | —       |
| 7  | HG_LCH_11  | Normal   | 75  | —             | —     | —       | —       | —       |
| 8  | HG_LCH_12  | Normal   | 63  | —             | —     | —       | —       | —       |
| 9  | HG_Lch_21  | Low      | 68  | 6             | 2.37  | T2B     | N0      | Mx      |
| 10 | HG_Lch_22  | Low      | 60  | 5             | 7.4   | T2A     | Nx      | Mx      |
| 11 | HG_Lch_23  | Low      | 60  | 7             | 4.4   | T2B     | N0      | Mx      |
| 12 | HG_Lch_24  | Low      | 50  | 6             | 2.8   | T2b     | Nx      | Mx      |
| 13 | HG_Lch_25  | Low      | 69  | 8             | 6.8   | T2B     | Nx      | Mx      |
| 14 | HG_Lch_26  | Low      | 56  | 7             | 9.36  | T2B     | Nx      | Mx      |
| 15 | HG_Lch_27  | Low      | 68  | 6             | 6.27  | Tx      | Nx      | Mx      |
| 16 | HG_Lch_28  | Low      | 69  | 7             | 1.8   | T2b     | N0      | Mx      |
| 17 | HG_Lch_29  | Low      | 64  | 7             | 1.6   | T2b     | N0      | Mx      |
| 18 | HG_Lch_30  | Low      | 65  | 6             | 9.25  | T2a     | N0      | Mx      |
| 19 | HG_Lch_31  | Low      | 68  | 7             | 4.29  | T2a     | N0      | Mx      |
| 20 | HG_Lch_32  | Low      | 63  | 7             | 8.65  | T2b     | Nx      | Mx      |
| 21 | HG_Lch_35  | High     | 70  | 8             | 4.13  | T2c     | Nx      | Mx      |
| 22 | HG_Lch_36  | High     | 60  | 7             | 4.21  | T3      | Nx      | Mx      |
| 23 | HG_Lch_38  | VeryHigh | 66  | 8             | 6.1   | T3a     | Nx      | Mx      |
| 24 | HG_Lch_39  | VeryHigh | 56  | 8             | 11.38 | T3b     | N0      | Mx      |
| 25 | HG_Lch_42  | VeryHigh | 63  | 9             | 11.24 | T3b     | N0      | Mx      |
| 26 | HG_Lch_45  | High     | 57  | 7             | 8.62  | T3      | N0      | Mx      |
| 27 | HG_Lch_47  | Low      | 64  | 7             | N/A   | T2b     | Nx      | Mx      |
| 28 | HG_Lch_48  | VeryHigh | 70  | 10            | 8.79  | T4      | N1      | Mx      |
| 29 | HG_Lch_49  | High     | 57  | 7             | 2.32  | T3      | N1      | Mx      |
| 30 | HG_Lch_50  | High     | 57  | 6             | 5.43  | T2c     | Nx      | Mx      |
| 31 | HG_Lch_52  | Low      | 60  | 7             | 5.1   | T2b     | N0      | Mx      |
| 32 | HG_Lch_53  | VeryHigh | 59  | 7             | 34.64 | T3b     | N1      | Mx      |
| 33 | HG_Lch_54  | High     | 62  | 8             | 5.6   | T2b     | N0      | Mx      |
| 34 | HG_Lch_55  | VeryHigh | 57  | 10            | 15.95 | T3b     | N1      | Mx      |
| 35 | HG_Lch_56  | High     | 50  | 6             | 5.7   | T2c     | Nx      | Mx      |
| 36 | HG_Lch_57  | High     | 58  | 8             | 1.6   | T2a     | N0      | Mx      |
| 37 | HG_Lch_58  | VeryHigh | 60  | 8             | 9.28  | T2b     | N1      | Mx      |
| 38 | HG_Lch_59  | High     | 65  | 7             | 9.21  | T2R1    | Nx      | Mx      |

|    |           |      |    |   |       |     |    |    |
|----|-----------|------|----|---|-------|-----|----|----|
| 39 | HG_Lch_60 | Low  | 59 | 7 | 5.13  | T2a | Nx | Mx |
| 40 | HG_Lch_61 | High | 64 | 7 | 4.87  | T2c | Nx | Mx |
| 41 | HG_Lch_62 | High | 67 | 9 | 14.56 | T2a | N0 | Mx |
| 42 | HG_Lch_64 | High | 69 | 9 | 38.87 | Tx  | Nx | Mx |

**Supplemental Table S2. MBD-Seq data information**

|    | Sample ID  | Sample Type   | Raw reads | Unique Mapped Reads | Recovered Multi-mapped Reads | Final Mapped Reads | Mapping Percentage |
|----|------------|---------------|-----------|---------------------|------------------------------|--------------------|--------------------|
| 1  | HG_LCH_01N | normal        | 37936734  | 24740715            | 10100582                     | 34841297           | 91.84%             |
| 2  | HG_LCH_04N | normal        | 40661558  | 26688329            | 11046502                     | 37734831           | 92.80%             |
| 3  | HG_LCH_05N | normal        | 54038752  | 30450618            | 18275423                     | 48726041           | 90.17%             |
| 4  | HG_LCH_06N | normal        | 49633325  | 32343426            | 13281013                     | 45624439           | 91.92%             |
| 5  | HG_LCH_09N | normal        | 44360027  | 30907913            | 10731777                     | 41639690           | 93.87%             |
| 6  | HG_LCH_10N | normal        | 52159226  | 33065040            | 14953560                     | 48018600           | 92.06%             |
| 7  | HG_LCH_11N | normal        | 50731967  | 31780016            | 14497846                     | 46277862           | 91.22%             |
| 8  | HG_LCH_12N | normal        | 50031476  | 32371385            | 13926639                     | 46298024           | 92.54%             |
| 9  | HG_LCH_21A | Low Adjacent  | 48195820  | 27947752            | 16570955                     | 44518707           | 92.37%             |
| 10 | HG_LCH_21T | Low           | 35883180  | 18722178            | 13644229                     | 32366407           | 90.20%             |
| 11 | HG_LCH_22A | Low Adjacent  | 55846770  | 35027289            | 16942145                     | 51969434           | 93.06%             |
| 12 | HG_LCH_22T | Low           | 51113317  | 32055208            | 15881497                     | 47936705           | 93.79%             |
| 13 | HG_LCH_23A | Low Adjacent  | 52258506  | 33915259            | 15098915                     | 49014174           | 93.79%             |
| 14 | HG_LCH_23T | Low           | 52815451  | 34775856            | 14810245                     | 49586101           | 93.89%             |
| 15 | HG_LCH_24A | Low Adjacent  | 52495902  | 32827680            | 15911211                     | 48738891           | 92.84%             |
| 16 | HG_LCH_25A | Low Adjacent  | 66772817  | 42035330            | 19763623                     | 61798953           | 92.55%             |
| 17 | HG_LCH_26A | Low Adjacent  | 44482565  | 27574153            | 13609480                     | 41183633           | 92.58%             |
| 18 | HG_LCH_26T | Low           | 34736522  | 16351404            | 14689580                     | 31040984           | 89.36%             |
| 19 | HG_LCH_27A | Low Adjacent  | 53546658  | 32892276            | 16225828                     | 49118104           | 91.73%             |
| 20 | HG_LCH_27T | Low           | 67669267  | 43907355            | 18595647                     | 62503002           | 92.37%             |
| 21 | HG_LCH_28T | Low           | 50491187  | 36524791            | 11013185                     | 47537976           | 94.15%             |
| 22 | HG_LCH_29A | Low Adjacent  | 46548956  | 30195594            | 13059088                     | 43254682           | 92.92%             |
| 23 | HG_LCH_29T | Low           | 31759354  | 19800894            | 9499959                      | 29300853           | 92.26%             |
| 24 | HG_LCH_30A | Low Adjacent  | 48733809  | 31608045            | 13679844                     | 45287889           | 92.93%             |
| 25 | HG_LCH_30T | Low           | 84008290  | 60500705            | 18326573                     | 78827278           | 93.83%             |
| 26 | HG_LCH_31A | Low Adjacent  | 52733407  | 35951055            | 13686286                     | 49637341           | 94.13%             |
| 27 | HG_LCH_31T | Low           | 46494014  | 31719929            | 12418218                     | 44138147           | 94.93%             |
| 28 | HG_LCH_32T | Low           | 55566715  | 38485297            | 14064408                     | 52549705           | 94.57%             |
| 29 | HG_LCH_35T | High          | 78833093  | 45058947            | 27772800                     | 72831747           | 92.39%             |
| 30 | HG_LCH_36T | High          | 47728652  | 27591043            | 16143671                     | 43734714           | 91.63%             |
| 31 | HG_LCH_38T | Very High     | 56826300  | 34793765            | 17693170                     | 52486935           | 92.36%             |
| 32 | HG_LCH_39T | Very High     | 198484398 | 97383590            | 82583807                     | 179967397          | 90.67%             |
| 33 | HG_LCH_42T | Very High     | 101485884 | 52014342            | 41237800                     | 93252142           | 91.89%             |
| 34 | HG_LCH_45A | High Adjacent | 55620733  | 35459979            | 15362048                     | 50822027           | 91.37%             |
| 35 | HG_LCH_45T | High          | 42982106  | 21072185            | 16884711                     | 37956896           | 88.31%             |
| 36 | HG_LCH_47A | Low Adjacent  | 52363667  | 26757691            | 20199514                     | 46957205           | 89.68%             |
| 37 | HG_LCH_47T | Low           | 47052155  | 23319726            | 18689231                     | 42008957           | 89.28%             |
| 38 | HG_LCH_48T | Very High     | 37223159  | 19166383            | 14707875                     | 33874258           | 91.00%             |

|    |            |           |           |          |          |           |        |
|----|------------|-----------|-----------|----------|----------|-----------|--------|
| 39 | HG_LCH_49T | High      | 143507709 | 73794267 | 57228721 | 131022988 | 91.30% |
| 40 | HG_LCH_50T | High      | 27749151  | 13538390 | 11466398 | 25004788  | 90.11% |
| 41 | HG_LCH_52T | Low       | 35635992  | 16905961 | 12288701 | 29194662  | 81.92% |
| 42 | HG_LCH_53T | Very High | 34600126  | 17431557 | 13992667 | 31424224  | 90.82% |
| 43 | HG_LCH_54T | High      | 35020773  | 17091101 | 14780620 | 31871721  | 91.01% |
| 44 | HG_LCH_55T | Very High | 53434859  | 38714549 | 11472466 | 50187015  | 93.92% |
| 45 | HG_LCH_56T | High      | 35398587  | 17400712 | 14557720 | 31958432  | 90.28% |
| 46 | HG_LCH_57T | High      | 40778665  | 19272863 | 17354738 | 36627601  | 89.82% |
| 47 | HG_LCH_58T | Very High | 52214996  | 36043811 | 12442761 | 48486572  | 92.86% |
| 48 | HG_LCH_59T | High      | 54693875  | 26539670 | 21555528 | 48095198  | 87.94% |
| 49 | HG_LCH_60T | Low       | 35032737  | 14111989 | 10647664 | 24759653  | 70.68% |
| 50 | HG_LCH_61T | High      | 45019969  | 22491961 | 18529350 | 41021311  | 91.12% |
| 51 | HG_LCH_62T | High      | 35856797  | 17330056 | 14683016 | 32013072  | 89.28% |
| 52 | HG_LCH_64T | High      | 57837869  | 41523842 | 12749045 | 54272887  | 93.84% |

**Supplemental Table S3. Number of genes used in IPA analysis**

| CDMP | Up-regulated Genes | Down-regulated Genes |
|------|--------------------|----------------------|
| S1D1 | 1210               | 1505                 |
| S1D0 | 102                | 163                  |
| S0D1 | 27                 | 11                   |
| S0D0 | 57                 | 37                   |
| S1G1 | 524                | 653                  |
| S1E1 | 692                | 652                  |
| S0E0 | 22                 | 10                   |

**Supplemental Table S4. Genes shown in the network in Figure 4 that are also up regulated in TCGA data**

| Gene   | Gene    | Gene          | Gene     |
|--------|---------|---------------|----------|
| ABCG1  | EZH2    | MAD2L2        | SERPINB6 |
| AURKA  | F2      | MMP9          | SMARCA4  |
| BAX    | FBP1    | NDUFA13       | STC2     |
| BIRC5  | FEN1    | NPM1          | TAP2     |
| CCNE1  | FGF8    | NPR3          | TARBP2   |
| CDC25A | FKBP4   | PDIA3         | TCF3     |
| CDK5   | FOXRED2 | PKMYT1        | TERT     |
| CDKN2A | HEYL    | PKN1          | TGM2     |
| CDT1   | HK2     | PSMB5         | TOP2A    |
| CLGN   | IER2    | PSMB7         | TPX2     |
| CYP1A1 | IGF2R   | PTK6          | TRADD    |
| CYP1B1 | IL11    | PYCR1         | TYMP     |
| DGAT2  | KCNJ12  | RAD9A         | TYMS     |
| DNMT3B | KIF15   | RNF126        | WDR5     |
| E2F1   | KIF2C   | SERF1A/SERF1B |          |

**Supplemental Table S5. Genes shown in the network in Figure 4 that are also down regulated in TCGA data**

| Gene     | Gene    | Gene              | Gene     |
|----------|---------|-------------------|----------|
| ADRA1D   | CXCL12  | KDR               | PTGS2    |
| ANGPT1   | CYP24A1 | KIT               | PTN      |
| AXL      | DAB2IP  | KLF4              | RGS12    |
| BMP4     | DIRAS3  | KLF6              | RNF128   |
| BMP7     | DNAJC15 | LAMB3             | SCK1     |
| BST1     | EDN2    | LOC102724428/SIK1 | SDC1     |
| CAV1     | EGFR    | LOXL2             | SDC3     |
| CCNA1    | ENO2    | MET               | SGK1     |
| CCNT1    | ENPP2   | MYL9              | SLC22A17 |
| CD34     | EPAS1   | NGF               | SMAD3    |
| CD9      | GLI2    | NOTCH1            | SMAD7    |
| CNTN1    | GSTM1   | PCOLCE2           | SPARC    |
| COL4A5   | GSTM2   | PDGFRA            | SV2A     |
| COL4A6   | HMGA2   | PDK4              | TAGLN    |
| COL5A1   | IGFBP3  | PEG10             | TP73     |
| COL6A1   | IGFBP4  | PHLDA1            | TRIP6    |
| COL6A2   | IRF5    | PHLDA3            | USP2     |
| COL6A3   | IRS1    | PLAU              | VIM      |
| CRISPLD2 | ITGA3   | PPP1R15A          | WNT3A    |
| CRYAB    | ITGA5   | PRKCE             | WNT5A    |



**Supplemental Table S6. Genes that are only in very high risk group and also differentially methylated in cohort as well as differentially expressed in TCGA RNA-seq data**

| CMP  | No. | Gene                                                                                                                                                                                                                                                                                                                                                                                                                                                                                                                                                                                                    |
|------|-----|---------------------------------------------------------------------------------------------------------------------------------------------------------------------------------------------------------------------------------------------------------------------------------------------------------------------------------------------------------------------------------------------------------------------------------------------------------------------------------------------------------------------------------------------------------------------------------------------------------|
| S0D0 | 73  | ACAP1, AIFM1, APLN, ARMCX1, ATP6AP1, BAGE, BLK, BRS3, CDH4, CDK10, CLDN2, CLEC4C, DEGS1, EP400NL, FAM66A, FAM86B2, FBP1, FMR1NB, GDF3, GLT6D1, GTF2H2B, GTSE1, GUSBP3, HMGB3, HSH2D, IGSF22, IL9R, L1CAM, LAIR2, LDHB, LOC100134868, LOC440896, LOC647859, MAP2K2, MAP7D3, MEF2B, MUC20, MYH3, NAA10, NLRP8, NVL, NXF3, PAK3, PLAC1, PNCK, PNMA5, PNPLA5, PPA, PPP1R14A, PRR5, PRR5-ARHGAP8, PRY2, RPL39, RUVBL2, SERF1A, SLC25A45, SLCO1A2, SMYD4, SNRNP70, SPATA2L, SSX2, SURF2, SYTL4, TAF7L, TECPR1, TK1, TKTL1, TUSC5, UPK1A, XKR5, XKRX, XPNPEP2, ZNF423                                          |
| S0D1 | 16  | AFMID, AIFM1, ATP6AP1, CDK10, HSH2D, IKZF1, NOP56, NOS3, NVL, PPA, RUVBL2, SIGLEC11, SLC25A45, SPATC1, UPK1A, ZNF732                                                                                                                                                                                                                                                                                                                                                                                                                                                                                    |
| S1D0 | 82  | ABCC3, ADCYAP1R1, ANO5, BEGAIN, C1QTNF1, CA3, CAMK1D, CIDEA, CLDN10, CPEB1, CPNE7, CYBA, DAAM2, DDX25, DNAH10, DPYSL2, EFEMP2, ELF4, EMX1, EPS8L1, FAM69C, FBLN5, FLRT2, FNDC1, FOSL1, FOXF2, GALR1, GAS7, GATA4, GFPT2, GRIK3, GRIN2A, HCG11, HFE, IKZF1, ITPKA, KCNH2, KCNJ12, KCTD14, KLHDC8A, KLHL21, LHX8, LINGO1, LYPD1, MAP1B, MAPK15, MDGA2, MFI2, MMP2, MMP28, MSX1, NEU1, NRN1, NUA1, PFKP, PITX2, PRRG3, PYGL, RGMA, RNF128, SHC3, SLC16A5, SLC17A9, SLC1A6, SOX1, SPATS1, SYT15, SYT9, TBX20, TFCP2L1, TIMP2, TRIP6, UCKL1, VGLL2, VIPR2, VSTM2L, WNT3A, WWC2, ZIC3, ZNF154, ZNF655, ZNF853 |
| S0G0 | 14  | DAZ2, DAZ4, EIF3C, FAM66A, FAM86B2, GAGE1, GTF2H2B, HSH2D, MEF2B, NBPF15, NVL, RUVBL2, SYTL4, TUSC5                                                                                                                                                                                                                                                                                                                                                                                                                                                                                                     |
| S0E0 | 25  | AIFM1, CBWD5, CELF5, DEGS1, EIF3C, FAM66A, FAM86B2, FBP1, GCNT1, GLT6D1, GTF2H2B, HMGB3, HSH2D, IL9R, LAIR2, LOC100134868, MUC20, MYH3, NVL, NXF3, SERF1A, SSH1, SSX2, TAF7L, XPNPEP2                                                                                                                                                                                                                                                                                                                                                                                                                   |
| S1E0 | 9   | FGF14, GRM6, LINGO2, NRK, ST8SIA1, STK32B, SV2A, TIMP2, TMEM132C                                                                                                                                                                                                                                                                                                                                                                                                                                                                                                                                        |

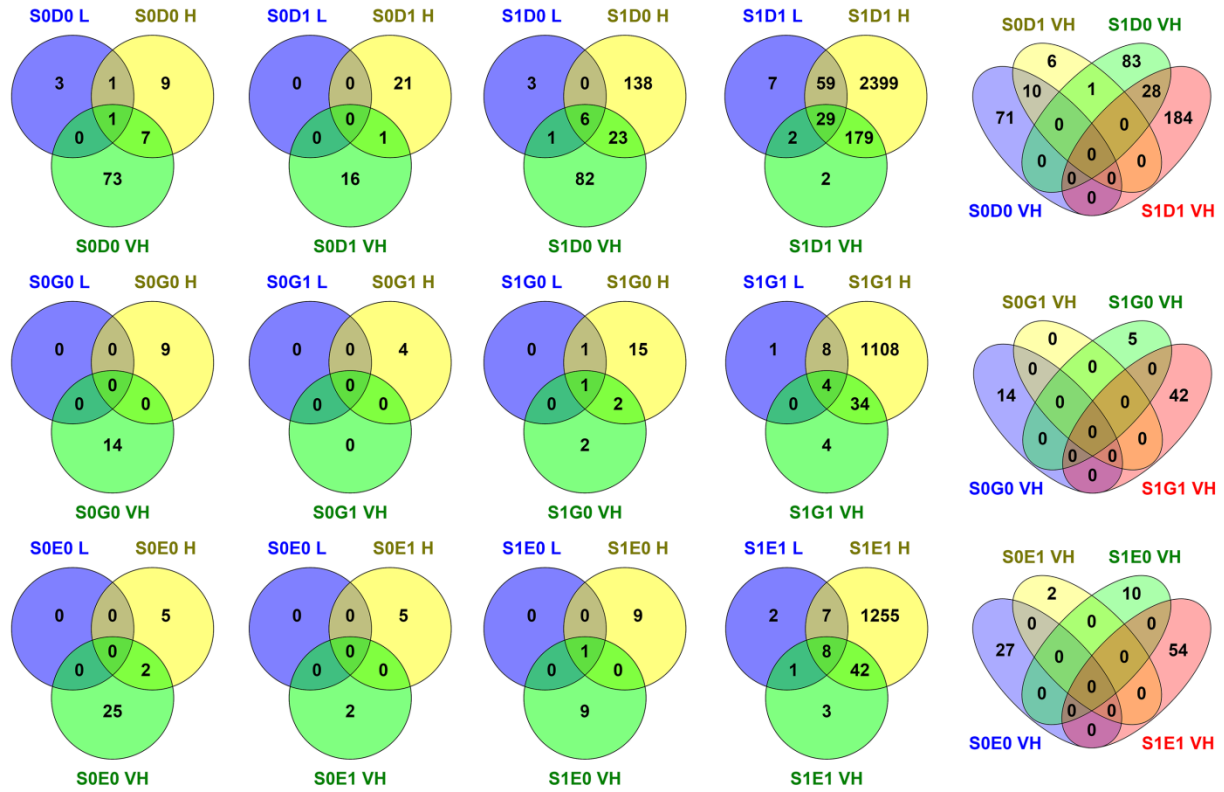

**Supplemental Figure S1.** Venn diagram of differentially expressed genes between different risk group in each CMP

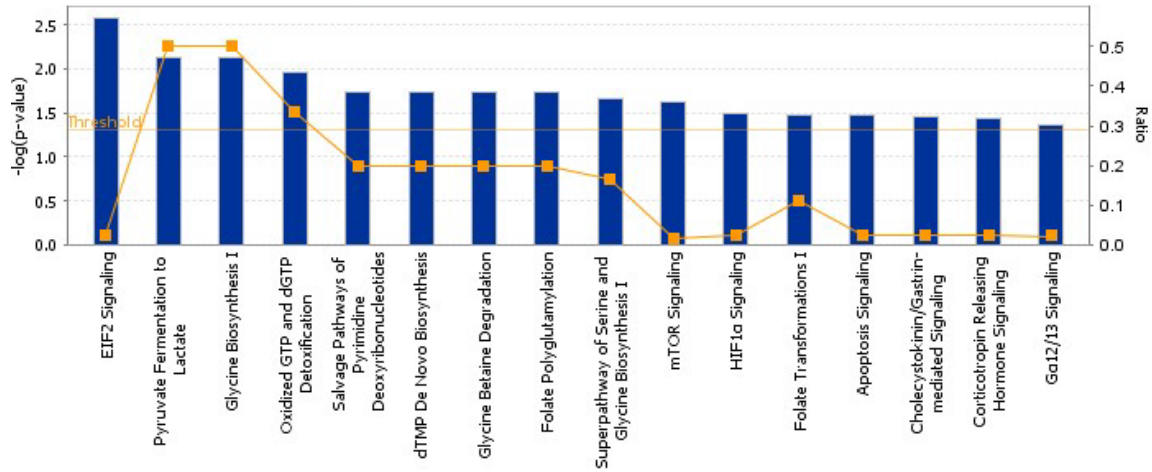

**Supplemental Figure S2.** S0D0 Canonical Pathways

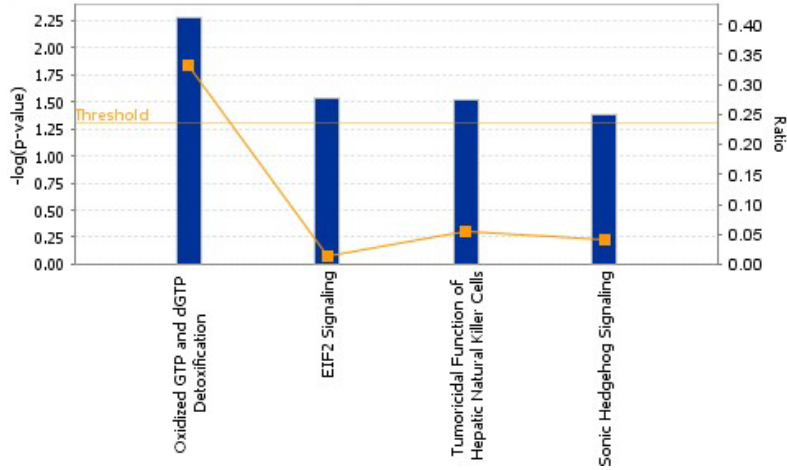

**Supplemental Figure S3. S0D1 Canonical Pathways**

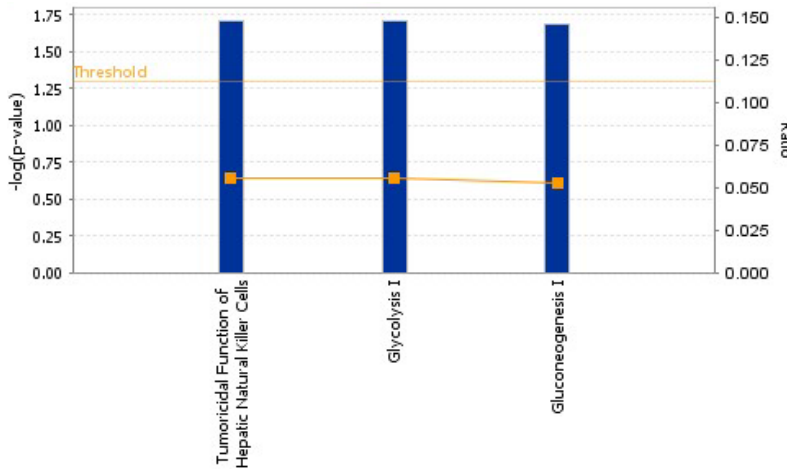

**Supplemental Figure S4. S0E0 Canonical Pathways**

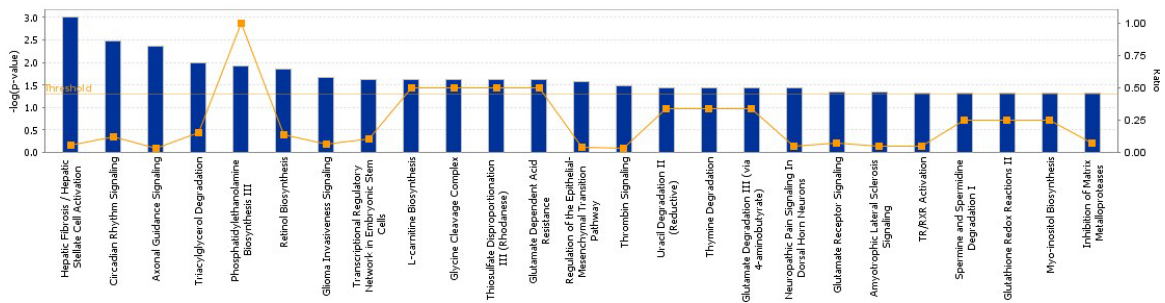

**Supplemental Figure S5. S1D0 Canonical Pathways**

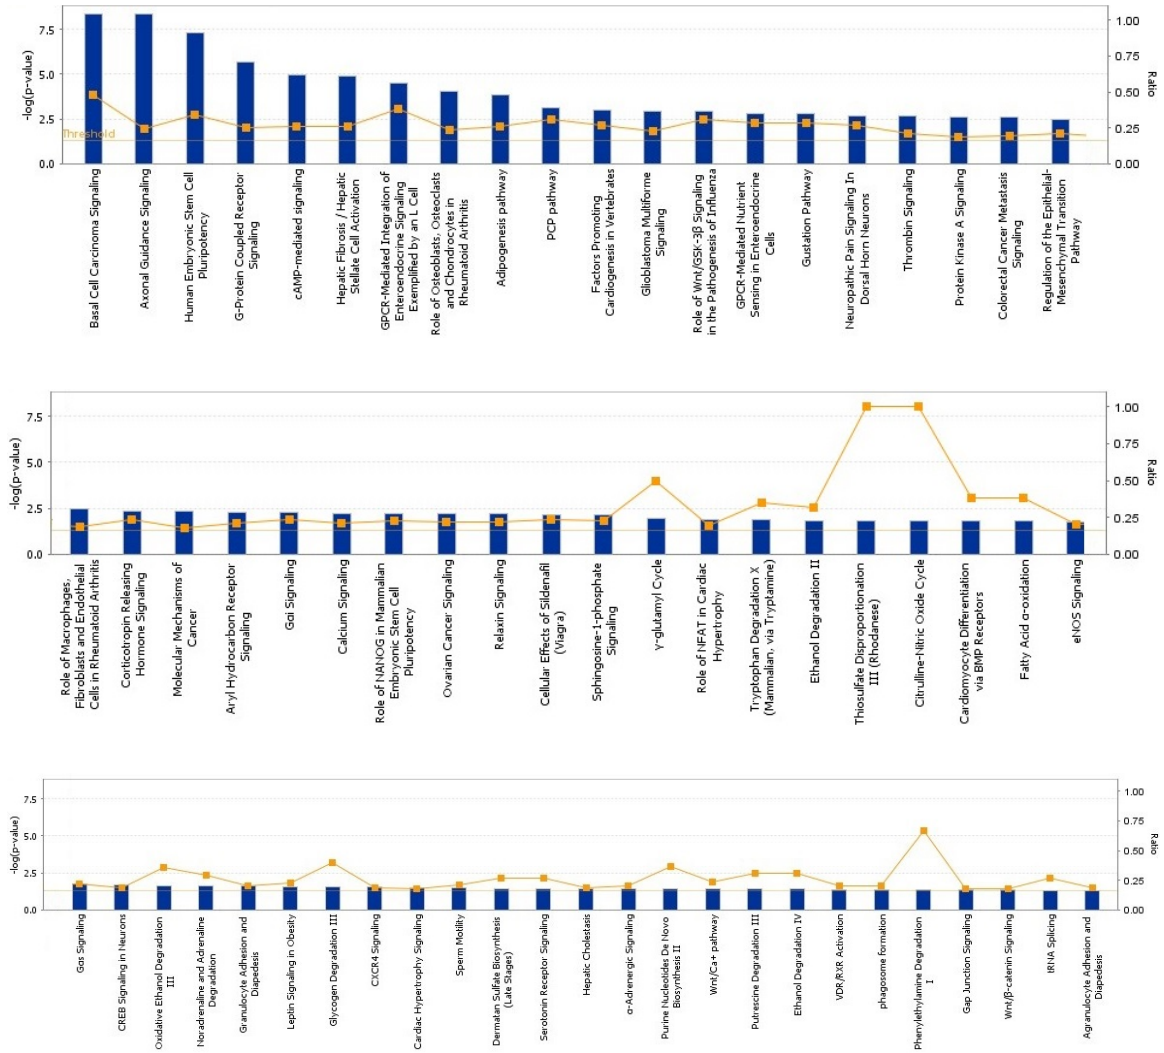

Supplemental Figure S6. S1D1 Canonical Pathways

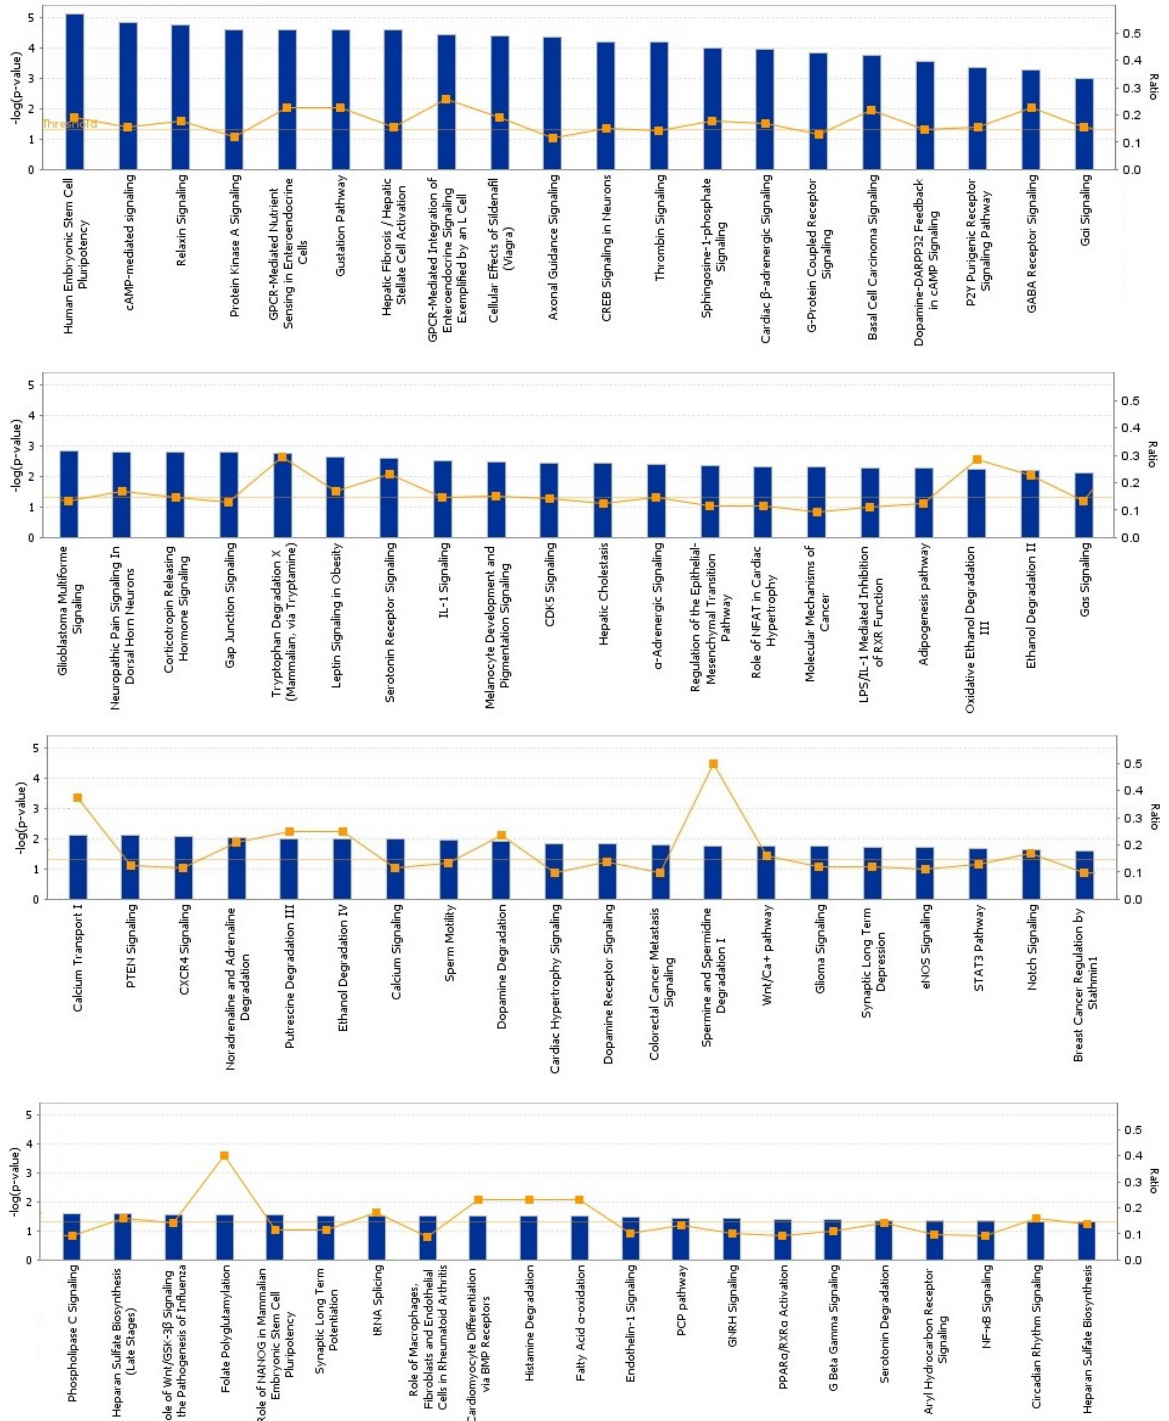

Supplemental Figure S7. S1G1 Canonical Pathways

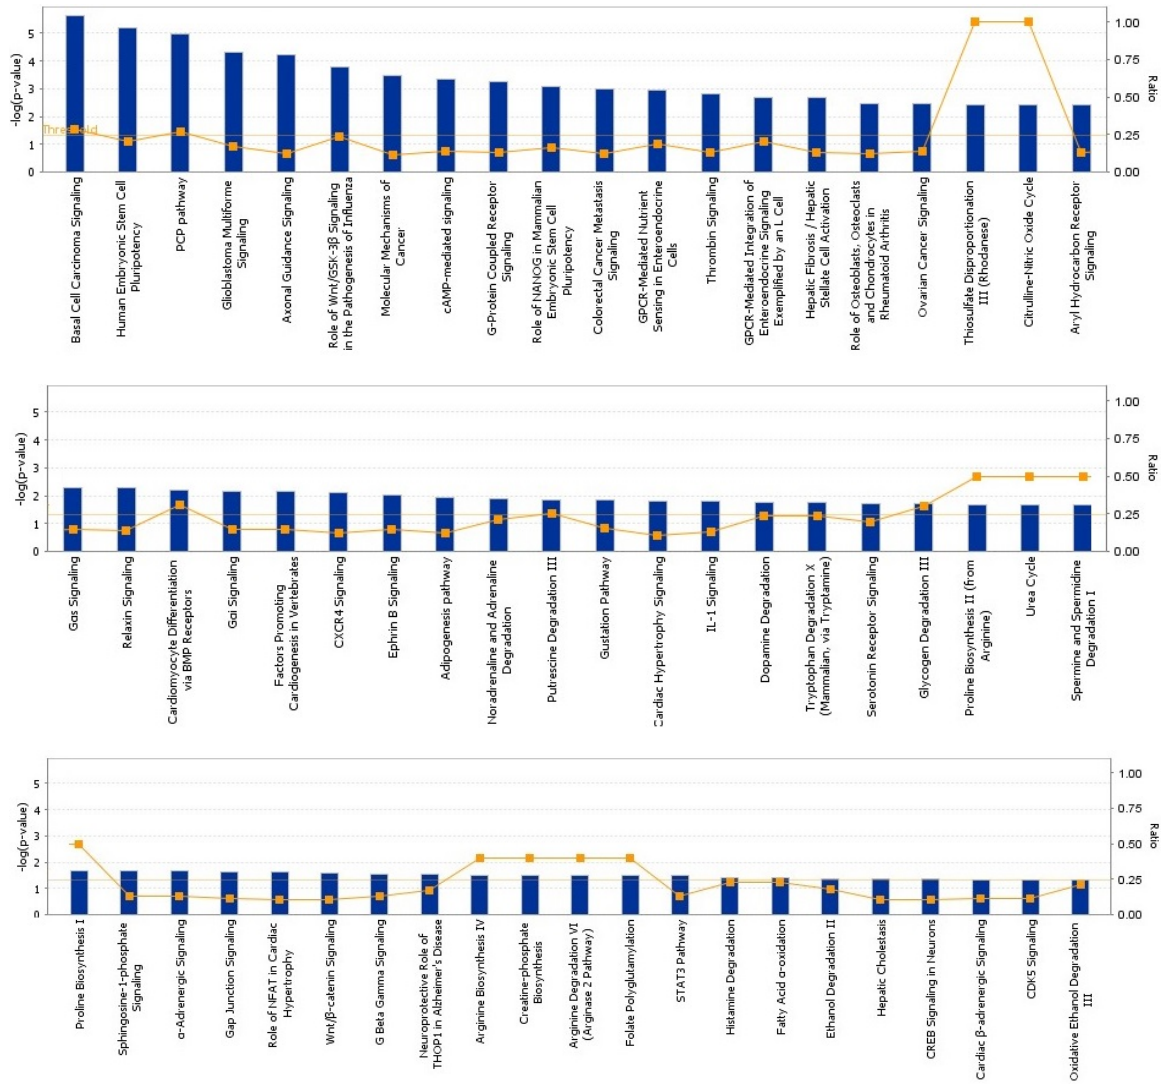

Supplemental Figure S8. S1E1 Canonical Pathways

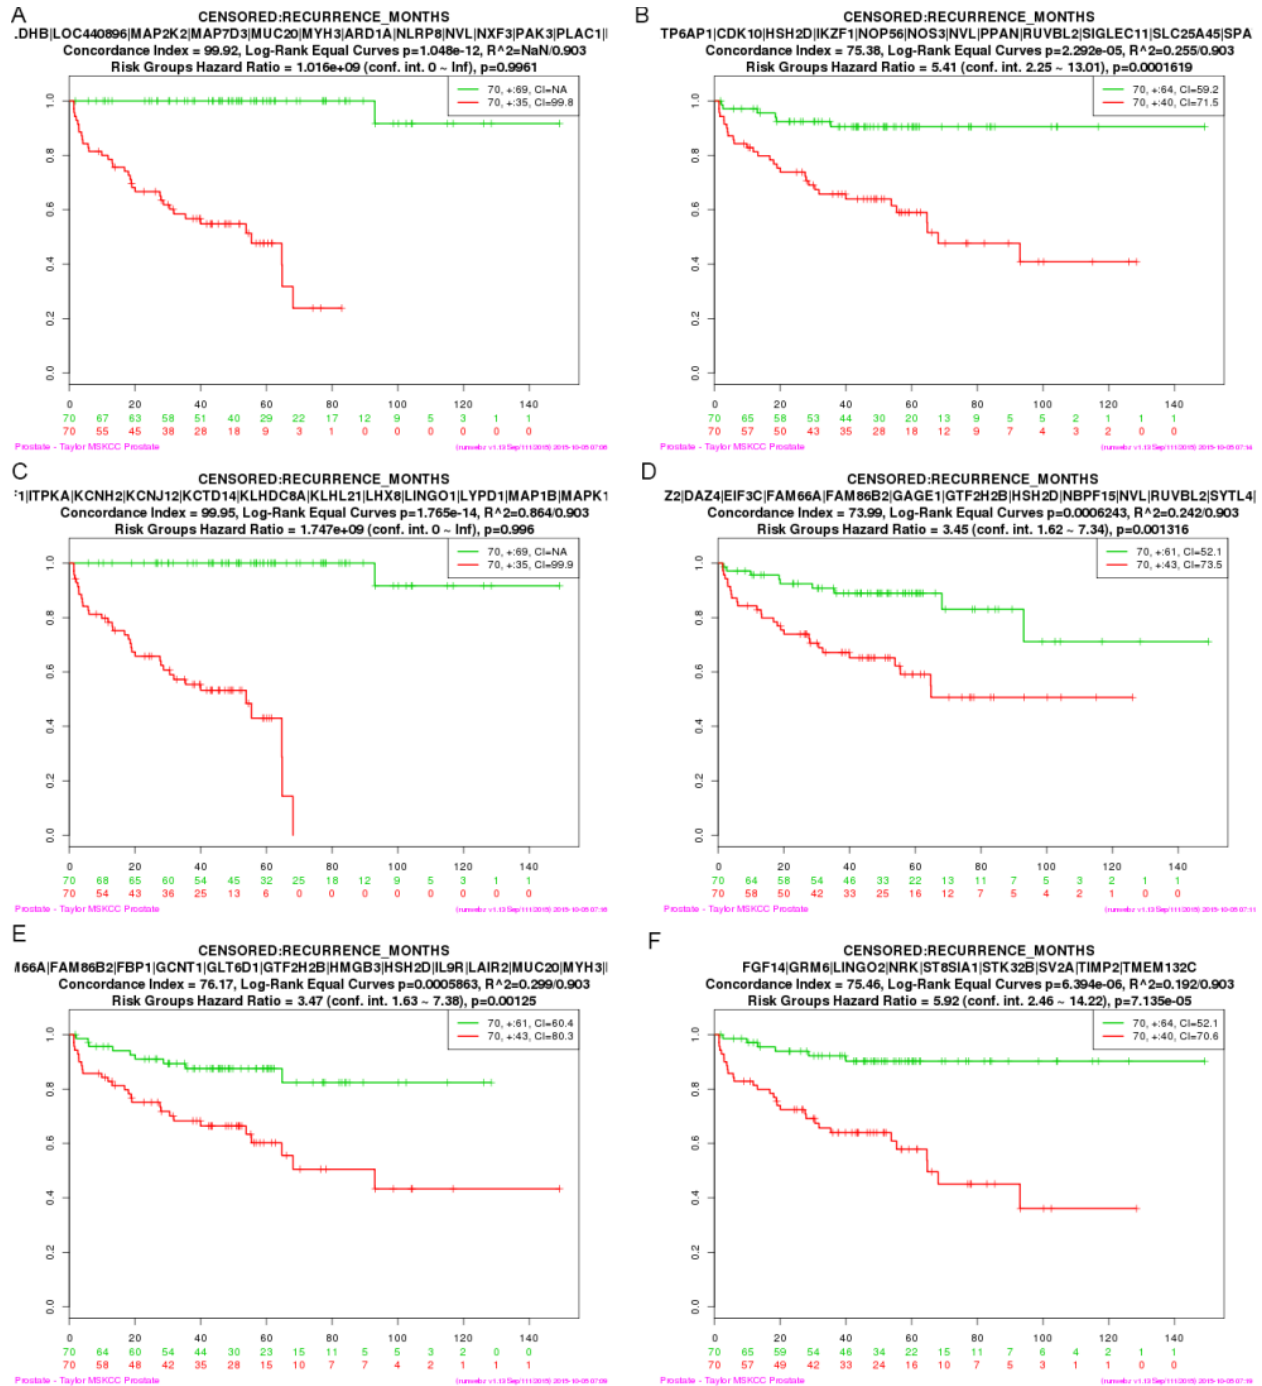

**Supplemental Figure S9.** Kaplan Meier curve of genes that are only differentially expressed and methylated in very high risk group  
 A: S0D0, B: S0D1, C: S1D0, D: S0G0, E: S0E0, F: S1E0.
